# Supplementary material for: Wild Felid Diversity, Space Use and Activity Patterns in the Eastern Himalaya, India
Source: MDPI journal article supplement (doi:10.3390/ecologies4010005), 2023-01-25
Supplement: s1 [file s1]

**Supplementary Table S1.** Photo-capture rate ( $\pm$  standard error) of potential prey species of carnivores in different habitats of the Prek catchment of Khangchendzonga Biosphere Reserve.

| Species                     | Subtropical | Temperate   | Sub-alpine  | Krummholtz  | Alpine      |
|-----------------------------|-------------|-------------|-------------|-------------|-------------|
| <b><i>Ungulates</i></b>     |             |             |             |             |             |
| Barking deer                | 5.88 (2.67) |             |             |             |             |
| Wild pig                    | 0.67 (0.29) |             |             |             | 0.03 (0.03) |
| Himalayan goral             | 9.14 (5.28) | 5.39 (2.94) | 0.97 (0.65) |             |             |
| Himalayan serow             | 1.06 (0.75) | 1.03 (0.49) | 1.00 (0.65) |             |             |
| Musk deer                   |             |             | 0.08 (0.06) | 0.11 (0.06) | 0.13 (0.11) |
| Himalayan tahr              |             |             | 0.13 (0.07) | 0.09 (0.04) | 0.05 (0.05) |
| Blue sheep                  |             |             |             |             | 2.73 (1.91) |
| <b><i>Small mammals</i></b> |             |             |             |             |             |
| Porcupine                   | 2.24 (0.83) |             |             |             |             |
| Hoary-bellied squirrel      | 3.04 (2.43) |             |             |             |             |
| Orange-bellied squirrel     | 0.08 (0.06) |             |             |             |             |
| Flying squirrel             |             |             | 0.07 (0.05) |             |             |
| Tree rat                    | 7.63 (3.57) | 4.42 (2.05) | 0.63 (0.51) |             |             |
| Moupin's pika               |             |             | 0.10 (0.10) |             |             |
| Large-eared pika            |             |             |             |             | 5.93 (2.77) |
| <b><i>Galliformes</i></b>   |             |             |             |             |             |
| Kalij pheasant              | 0.54 (0.23) |             |             |             |             |
| Satyr tragopan              | 0.32 (0.27) | 0.51 (0.27) | 0.74 (0.50) |             |             |
| Blood pheasant              |             |             | 2.32 (0.72) | 3.43 (1.28) | 4.30 (2.23) |
| Himalayan monal             |             |             | 0.42 (0.17) | 1.51 (0.58) | 2.36 (0.98) |
| Snow partridge              |             |             |             |             | 0.52 (0.49) |
| <b><i>Primates</i></b>      |             |             |             |             |             |
| Assamese macaque            | 2.56 (1.07) |             |             |             |             |
| Central Himalayan Langur    | 1.41 (1.34) |             |             |             |             |
